# Supplementary material for: The formation of a lithium–iridium complex hydride toward ammonia synthesis
Source: Royal Society of Chemistry journal article supplement (doi:10.1039/d2fd00142j), 2022-11-30
Supplement: d2fd00142j1.pdf [file d2fd00142j1.pdf]

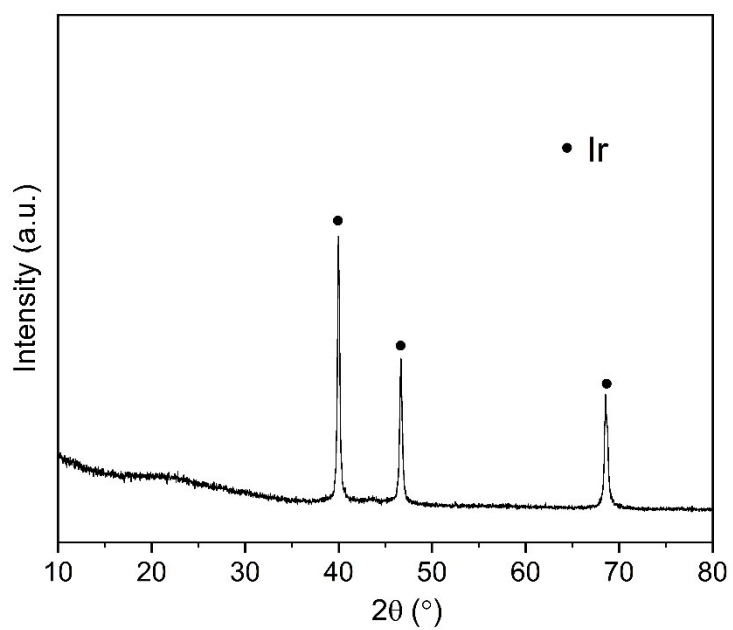

**Figure S1.** XRD patterns of the as-prepared Ir metal. The reference pattern code of Ir is 00-046-1044.

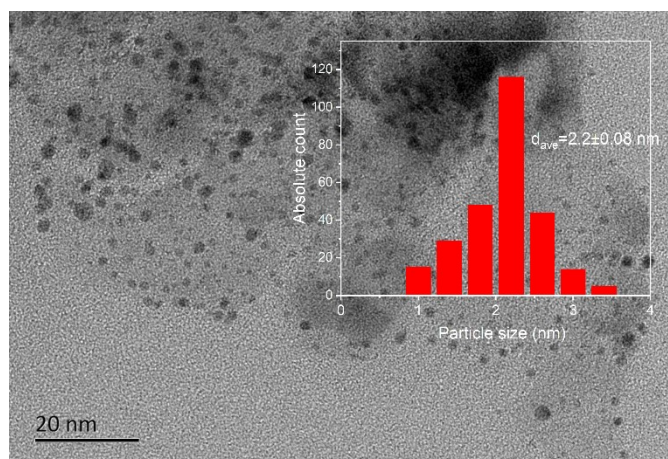

**Figure S2.** TEM image of the hydrogenated LiH-Ir/MgO catalyst. The inset picture shows the corresponding particle size distribution.

**Table S1.** Kinetic parameters of LiH-Ir/MgO catalyst and the conventional Ru and Fe catalysts.

| Catalyst                | Reaction order <sup>a</sup> |                     |                      | E <sub>a</sub> (kJ mol <sup>-1</sup> ) |
|-------------------------|-----------------------------|---------------------|----------------------|----------------------------------------|
|                         | $\alpha(\text{NH}_3)$       | $\beta(\text{N}_2)$ | $\gamma(\text{H}_2)$ |                                        |
| LiH-Ir/MgO <sup>a</sup> | -0.65                       | 1.27                | -0.36                | 53.4 (300-400 °C)                      |
| Cs-Ru/MgO <sup>b</sup>  | -0.09                       | 1.01                | -0.82                | 112.4 (250-325 °C)                     |
| Ru/MgO <sup>b</sup>     | -0.24                       | 1.12                | -0.86                | 94.8 (250-325 °C)                      |
| KM1 <sup>c</sup>        | -1.50                       | 0.90                | 2.20                 | 70 (320-400 °C)                        |

<sup>a</sup>Reaction orders of N<sub>2</sub>, H<sub>2</sub>, and NH<sub>3</sub> of LiH-Ir/MgO were measured at 350 °C and 10 bar;

<sup>b</sup>Reaction orders of N<sub>2</sub>, H<sub>2</sub>, and NH<sub>3</sub> of Cs-Ru/MgO or Ru/MgO were measured at 300 °C and 1 bar (Chen et al.<sup>1</sup>);

<sup>c</sup>Reaction orders of N<sub>2</sub>, H<sub>2</sub>, and NH<sub>3</sub> of KM1 were measured at 300 °C and 10 bar (Chorkendorff et al.<sup>2</sup>).

## References

1. Q. Wang, J. Pan, J. Guo, H. A. Hansen, H. Xie, L. Jiang, L. Hua, H. Li, Y. Guan, P. Wang, W. Gao, L. Liu, H. Cao, Z. Xiong, T. Vegge and P. Chen, *Nat. Catal.*, 2021, **4**, 959-967.
2. S. Hagen, R. Barfod, R. Fehrmann, C. J. H. Jacobsen, H. T. Teunissen and I. Chorkendorff, *J. Catal.*, 2003, **214**, 327-335.
